# Supplementary material
Source: PubMed Central journal article supplement (PMC6235111)
Supplement: NIHMS80440-supplement-Supplementary_Figures.pdf [file NIHMS80440-supplement-Supplementary_Figures.pdf]

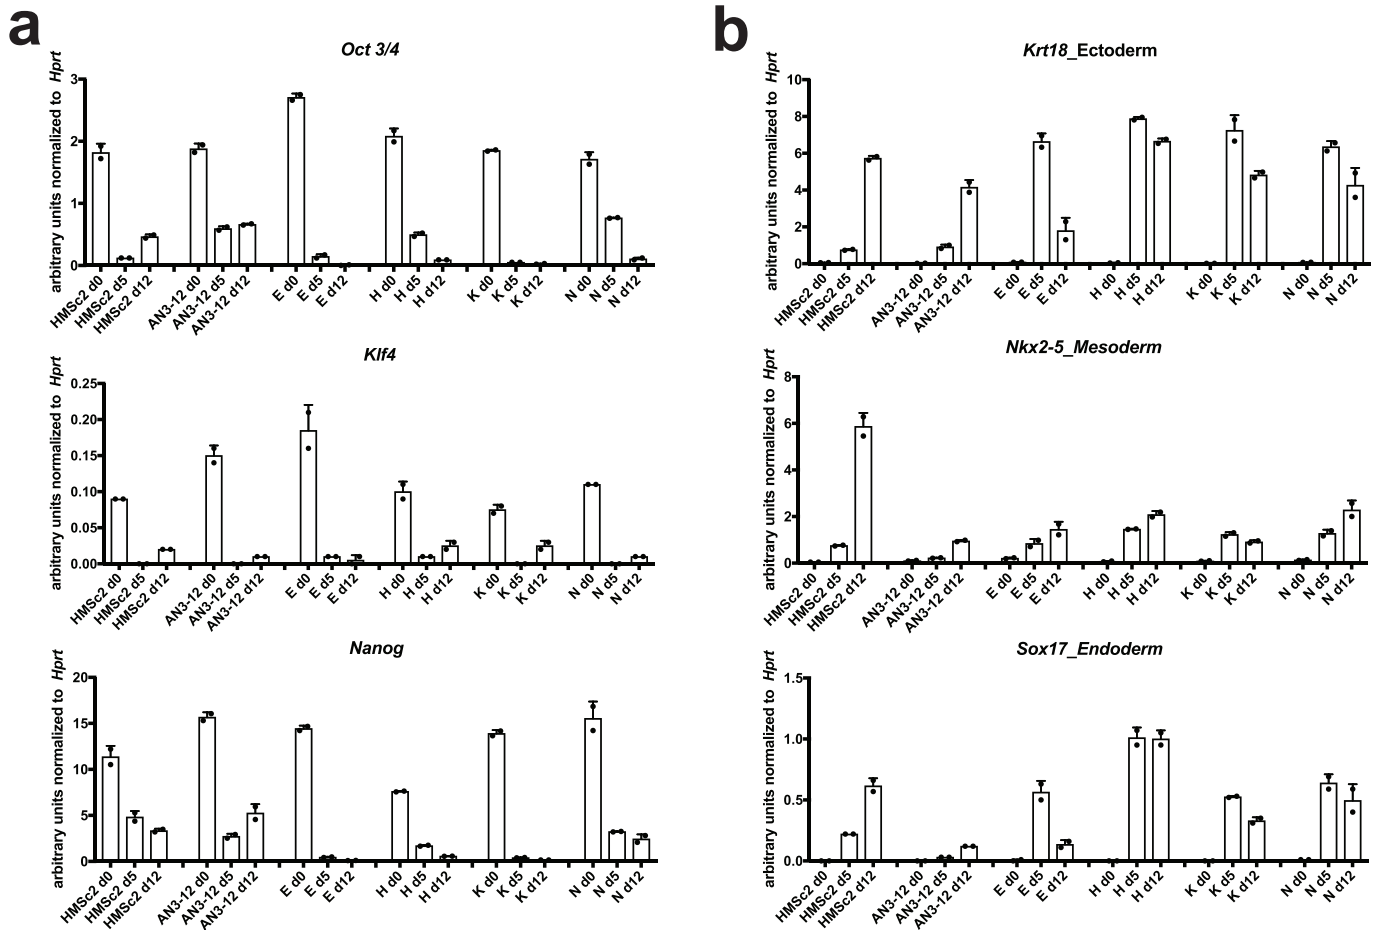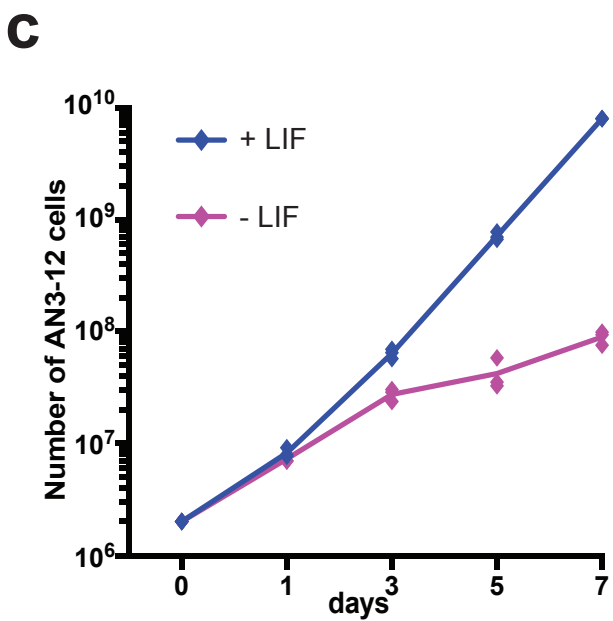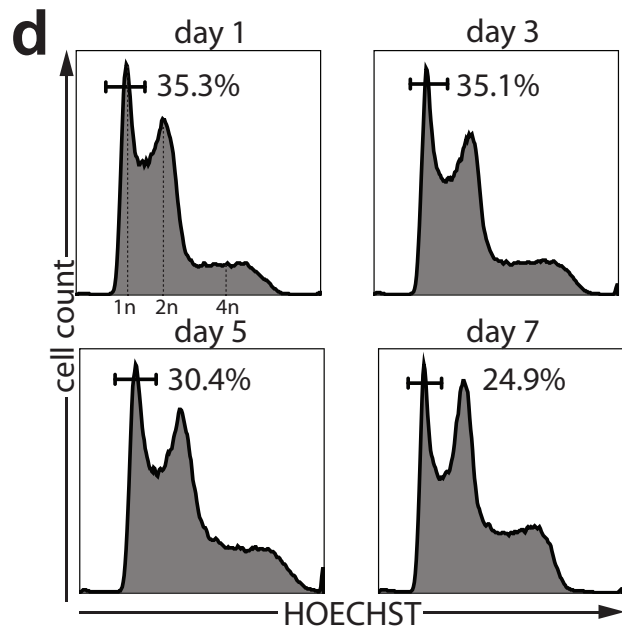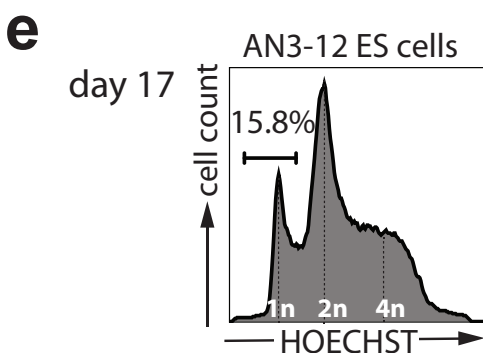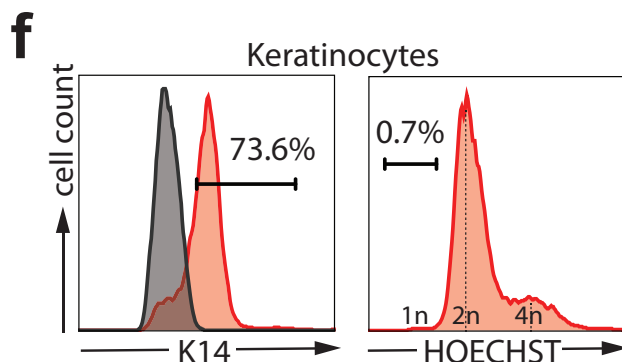

**Extended Data Figure 1**

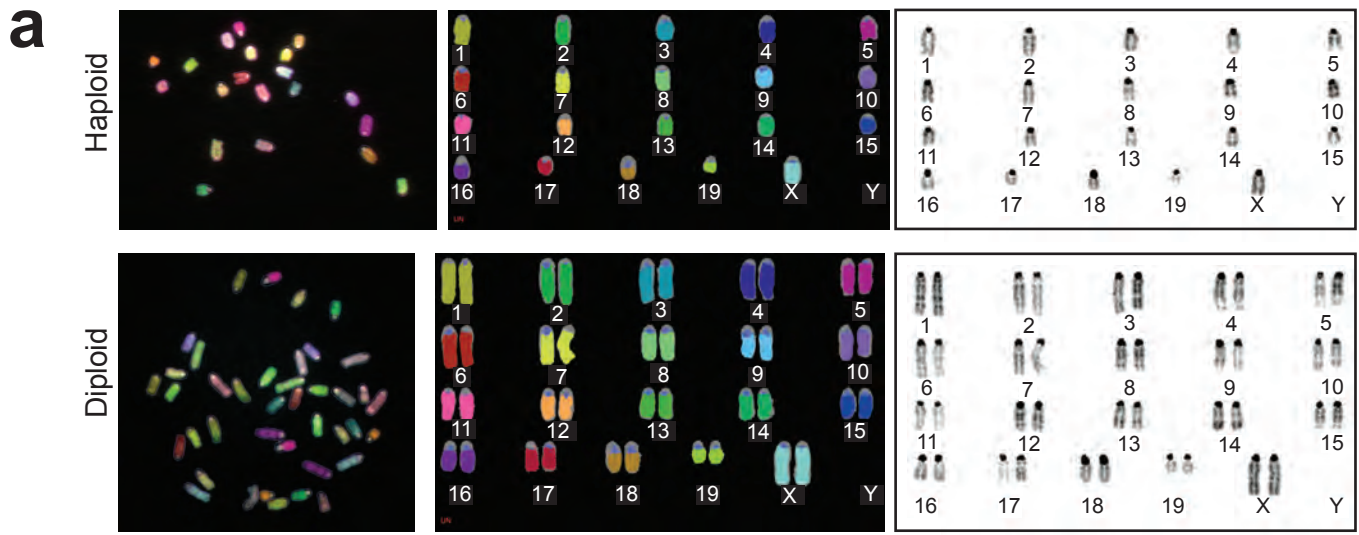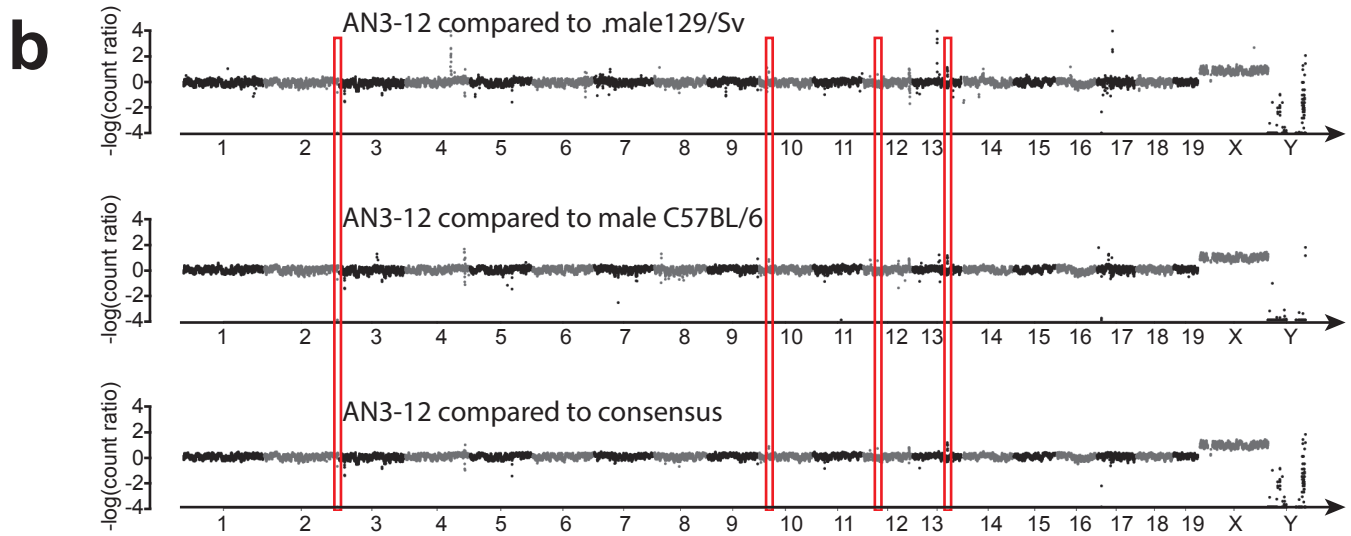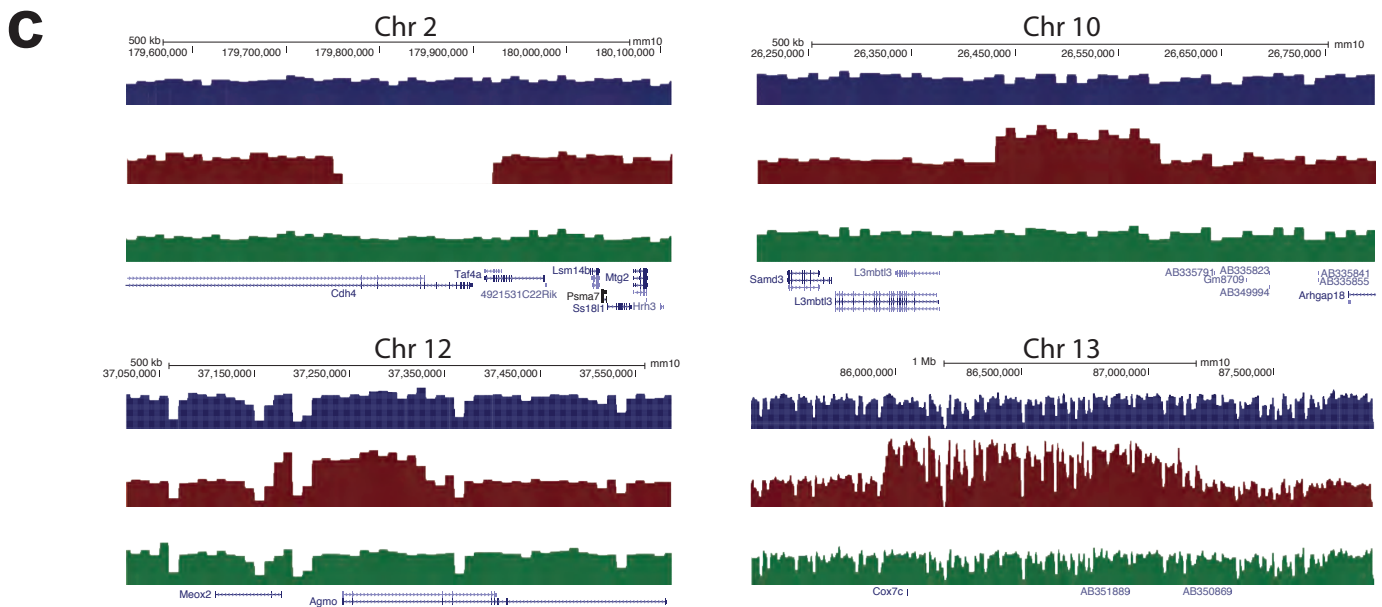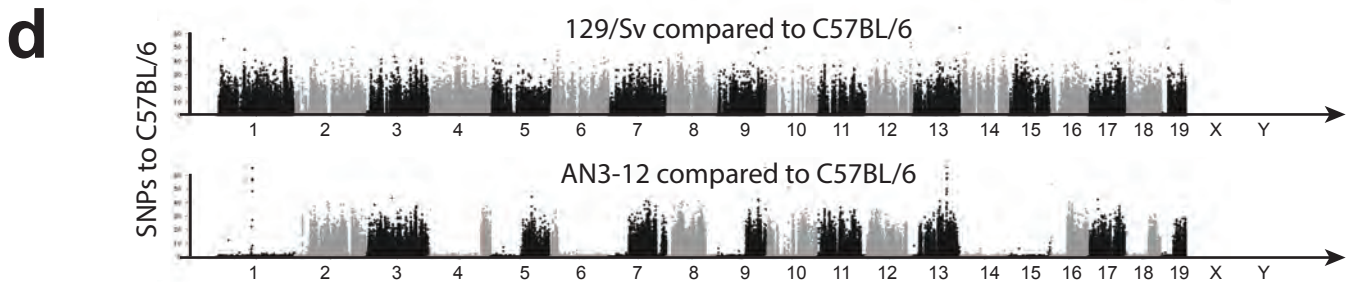

**Extended Data Figure 2**

**a**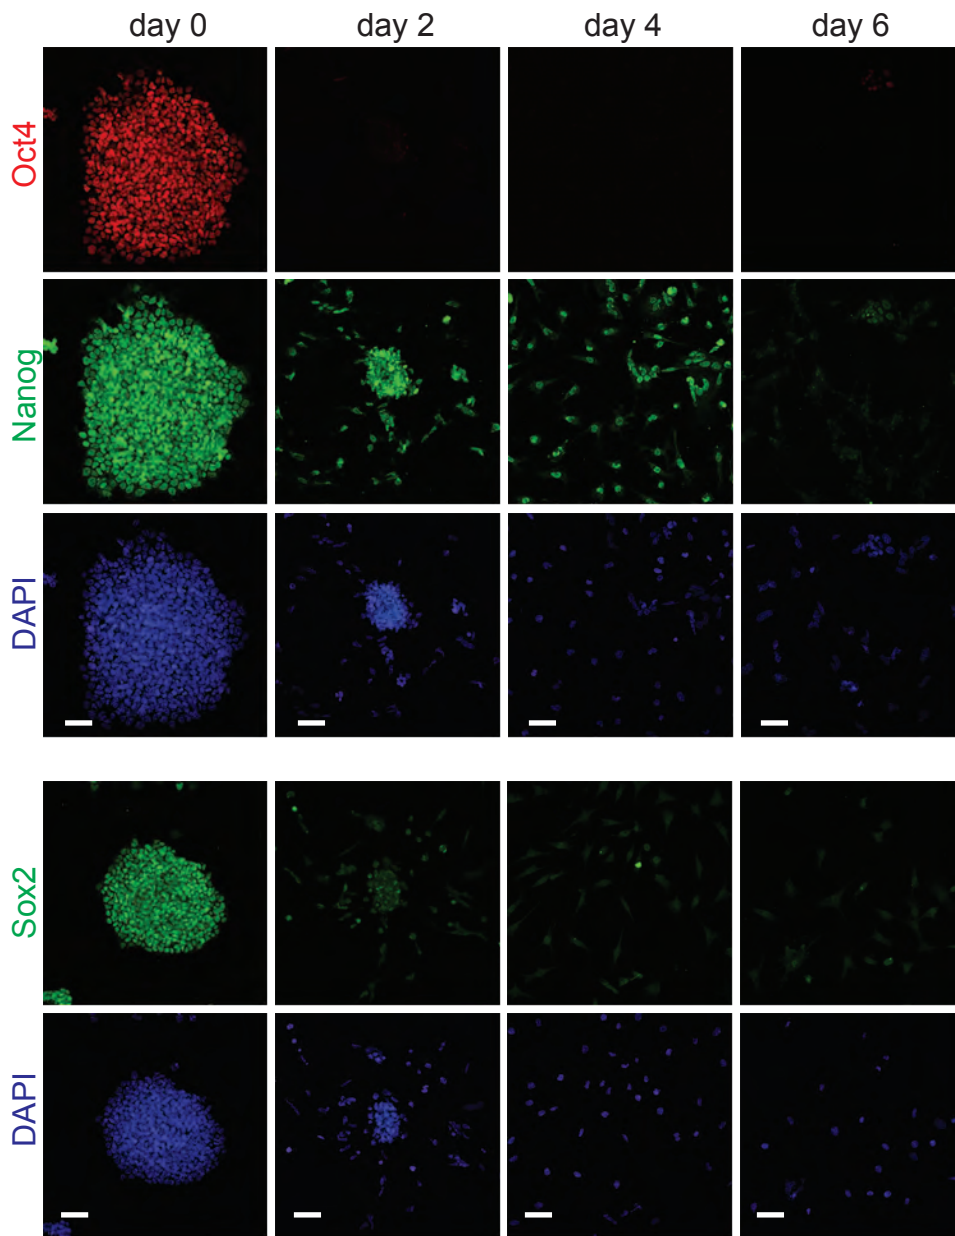**b**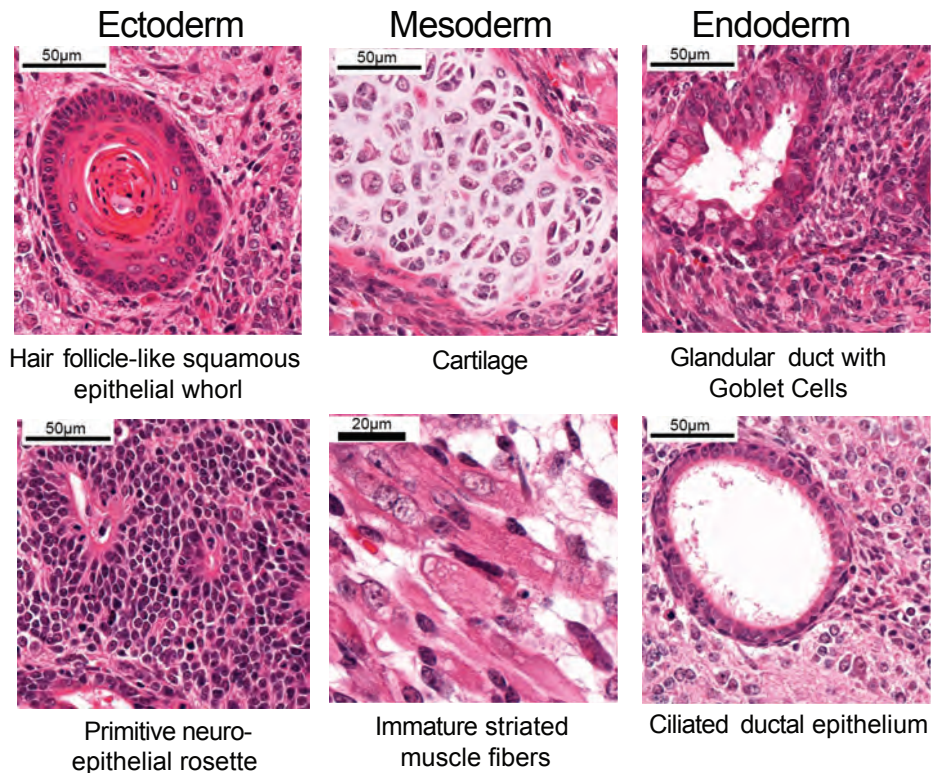

# Extended Data Figure 3





**a**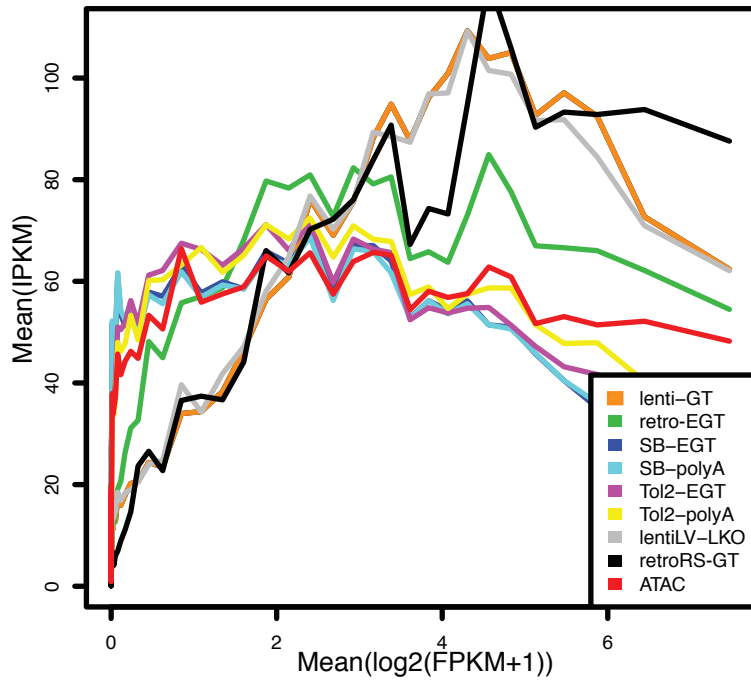**b**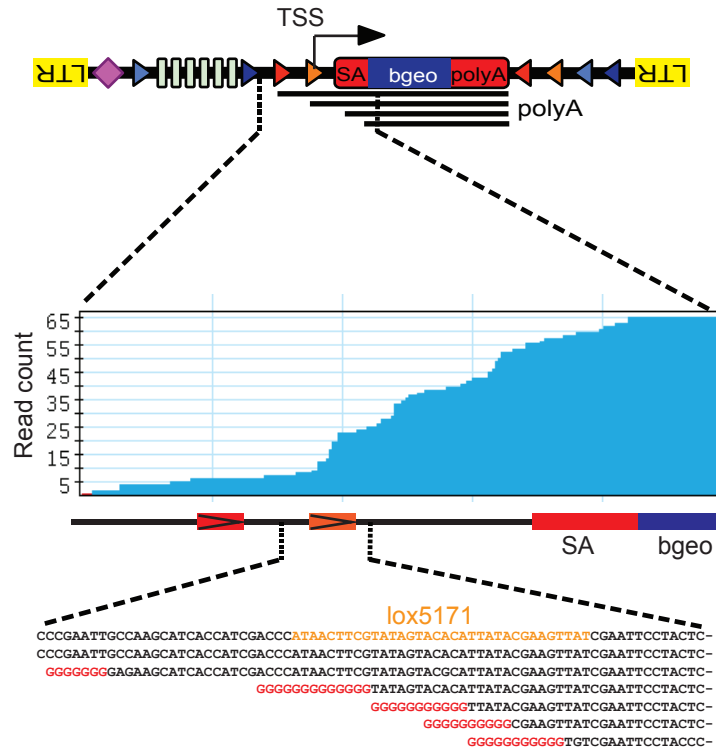**c**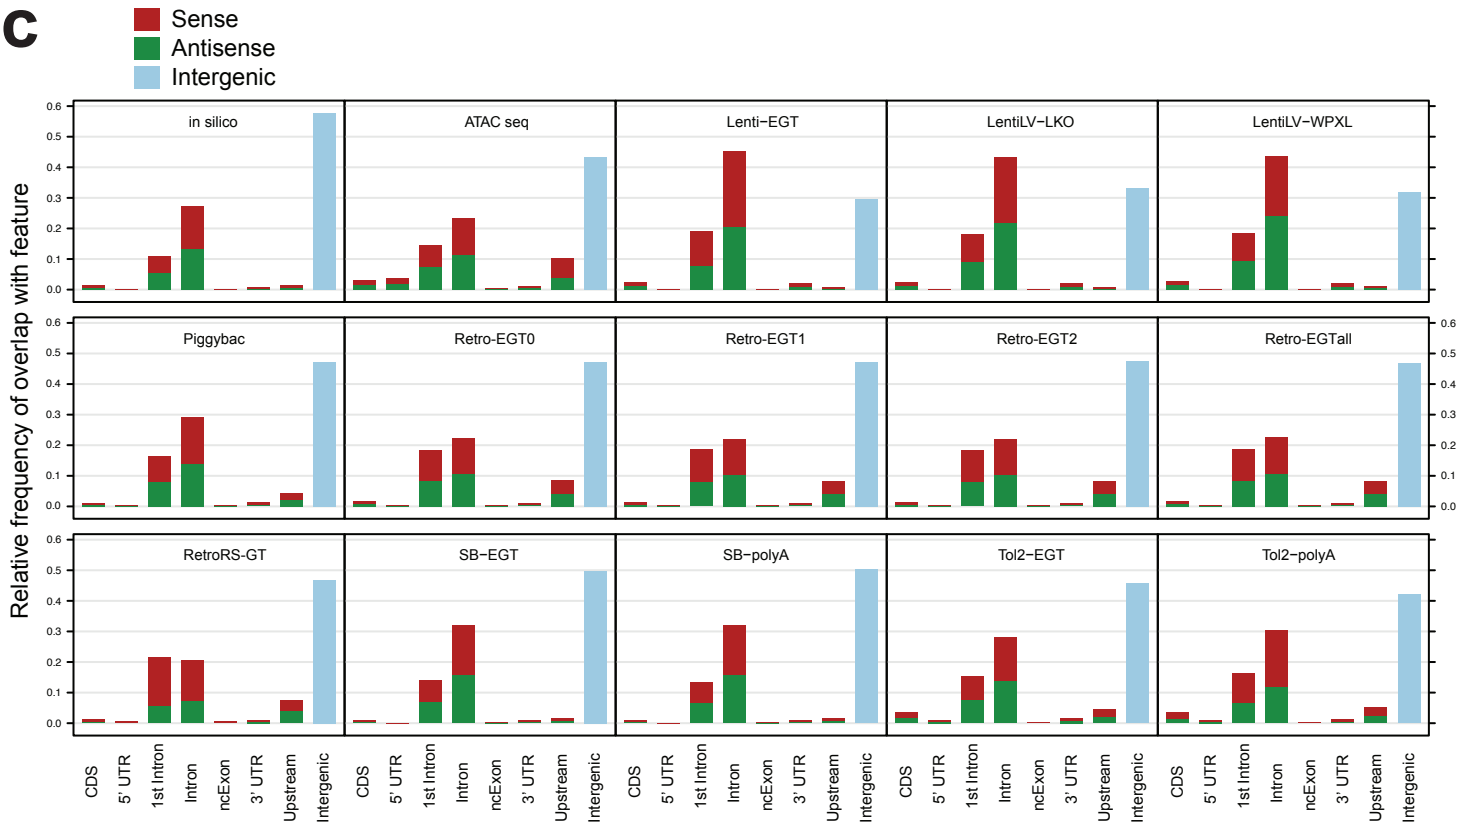

# Extended Data Figure 5

**a**

Insertional mutagenesis  
Neomycin selection

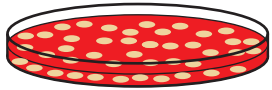

FACS sort for haploidy  
Grow out colonies

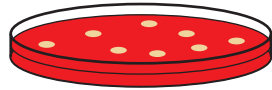

pick  
array

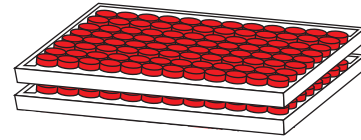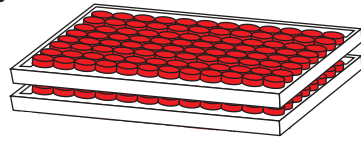

Cell banking

Sequencing

Cell lysis

**b**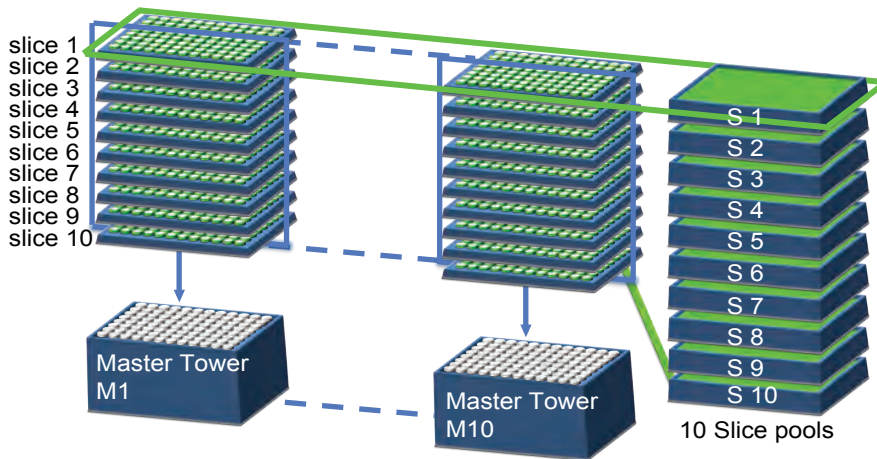**c**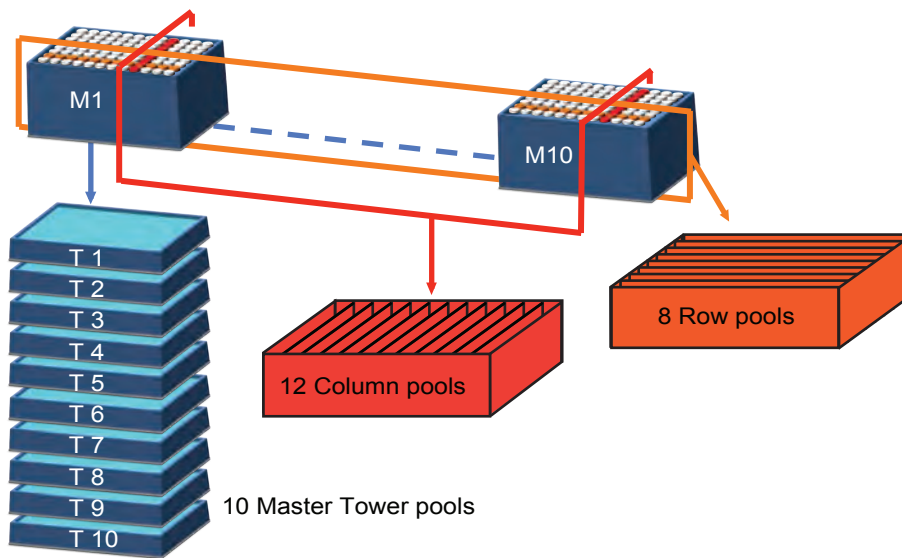**d**

4-Dimensional pooling

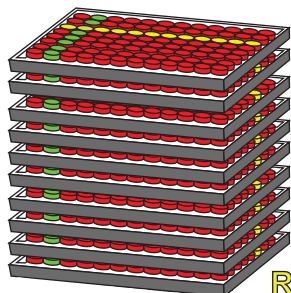

sum: 9 600 clones  
in 40 pools

PCR

read 1

iPCR1 genomic read

iPCR2 genomic read

bcPCR barcode

NGS on illumina platform

read 2

barcode

barcode

barcode

experimental index

4D coordinates

4D coordinates

4D coordinates

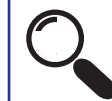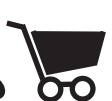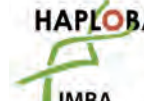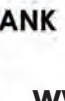

www.haplobank.at

# Extended Data Figure 6

## Available Clones per Gene

**a**

**RefSeq Genes**

**Ensembl Genes**

**Single integrations**

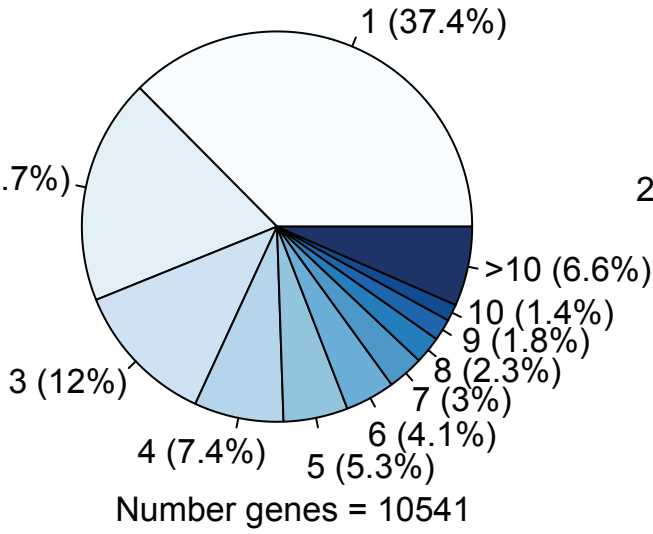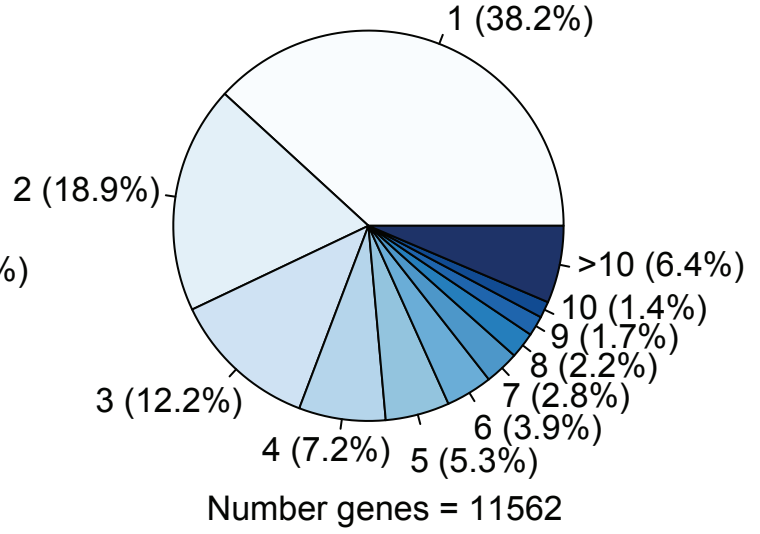

**b**

**All integrations**

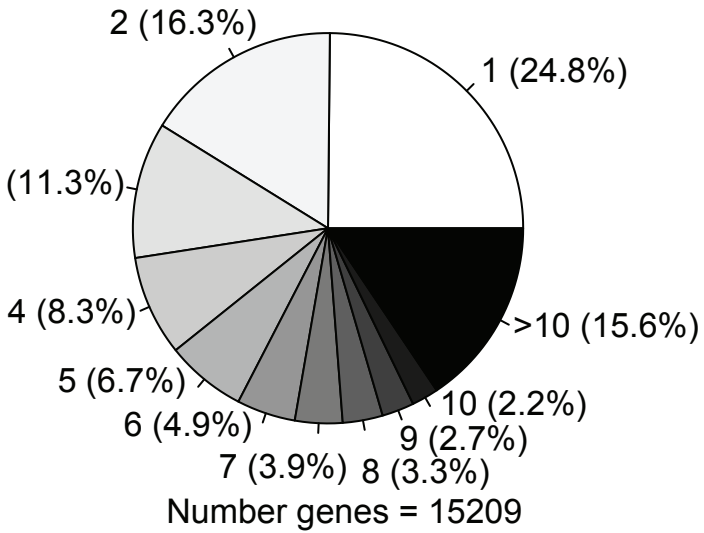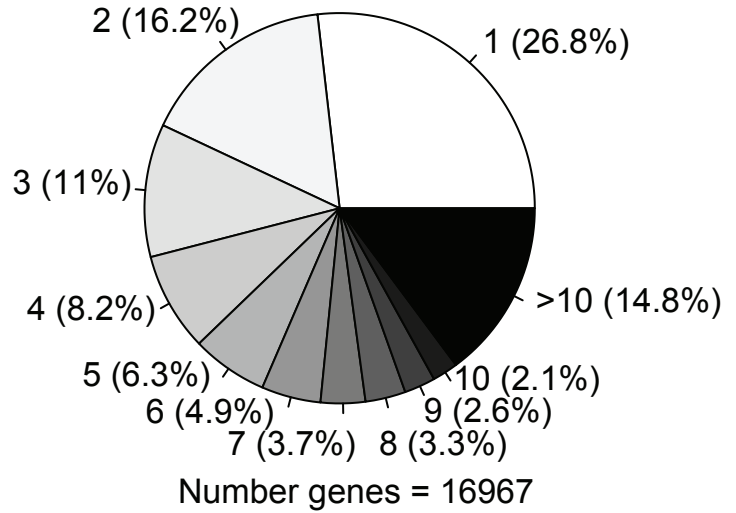

**c**

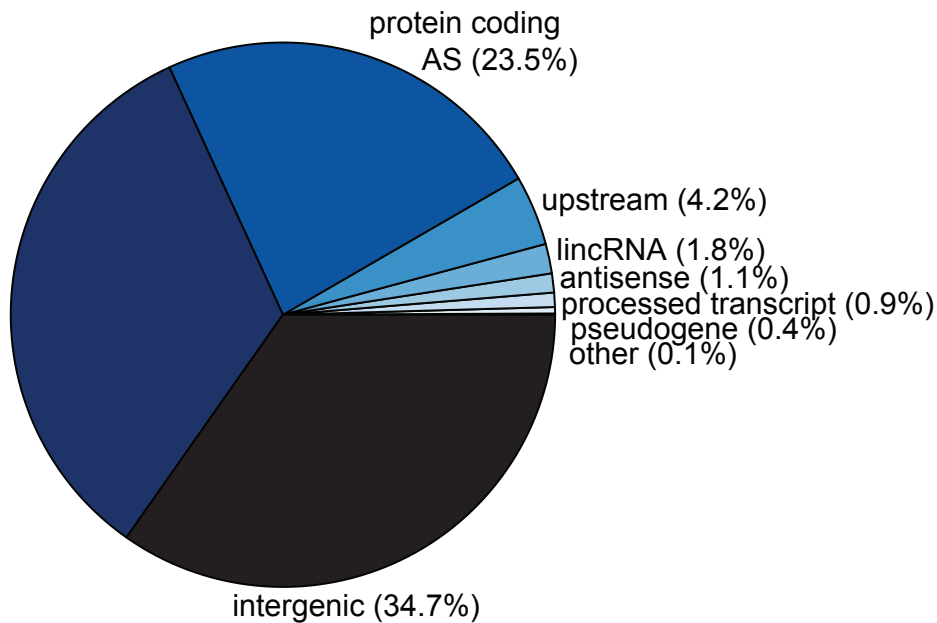

# Extended Data Figure 7

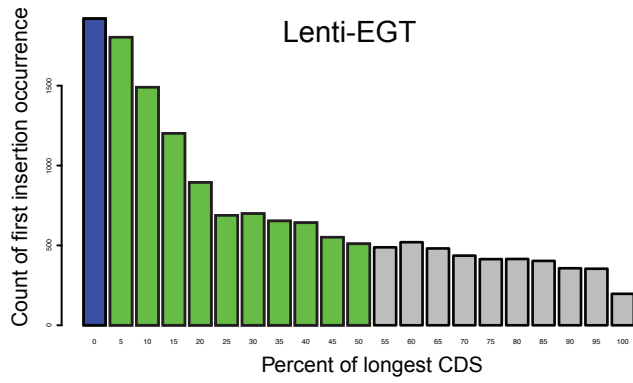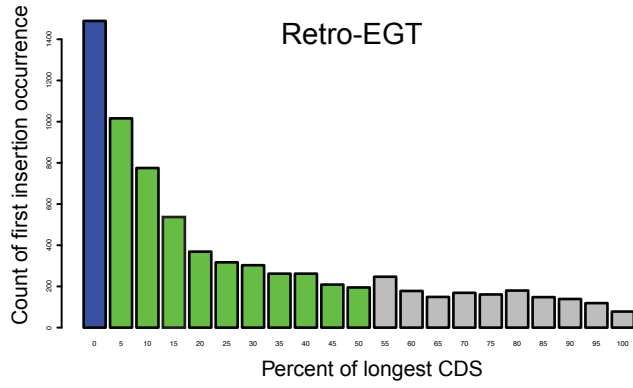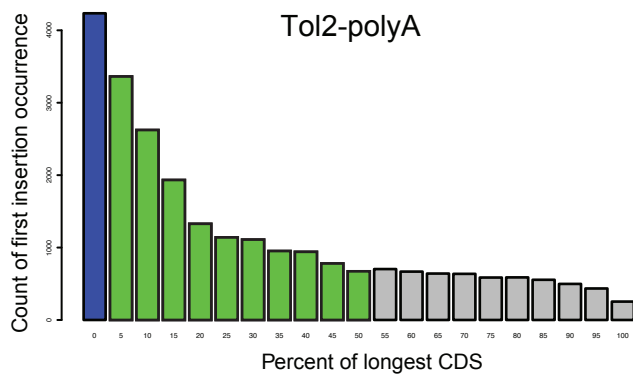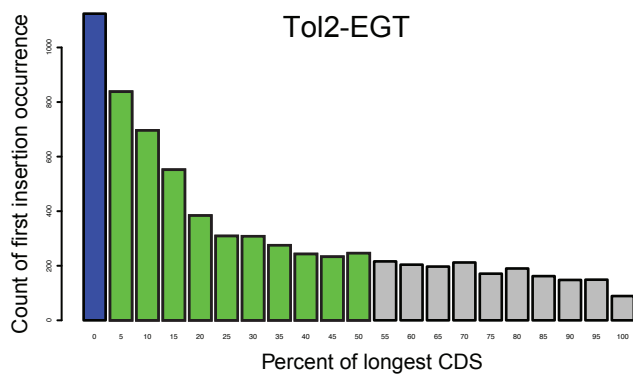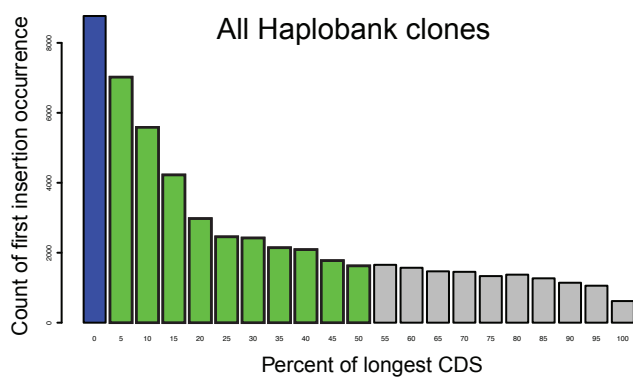

# Extended Data Figure 8



# a mES cells + RV-A1a

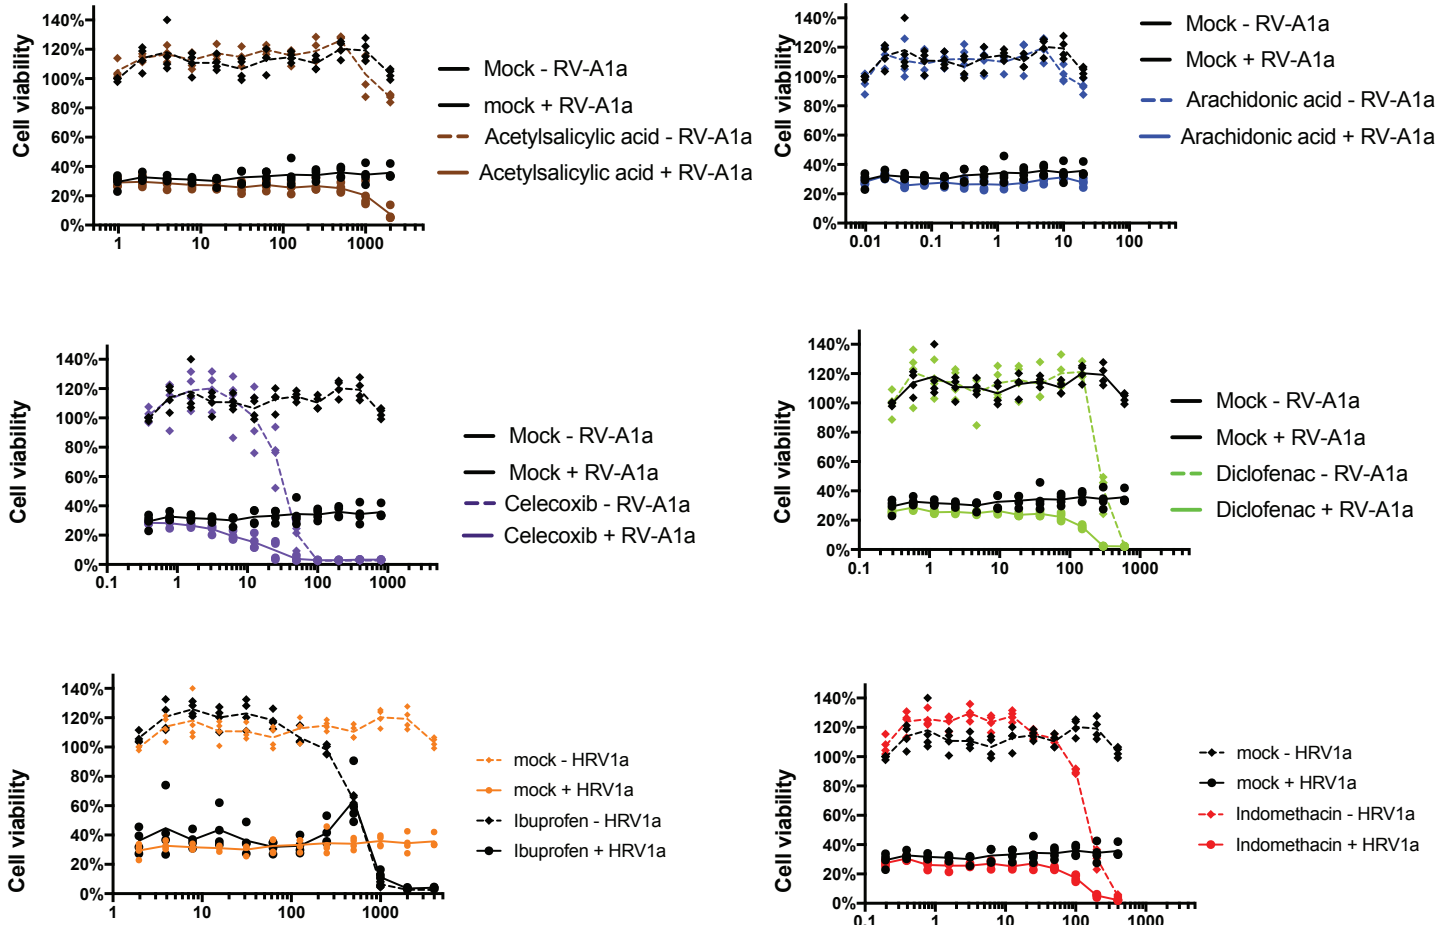

# b

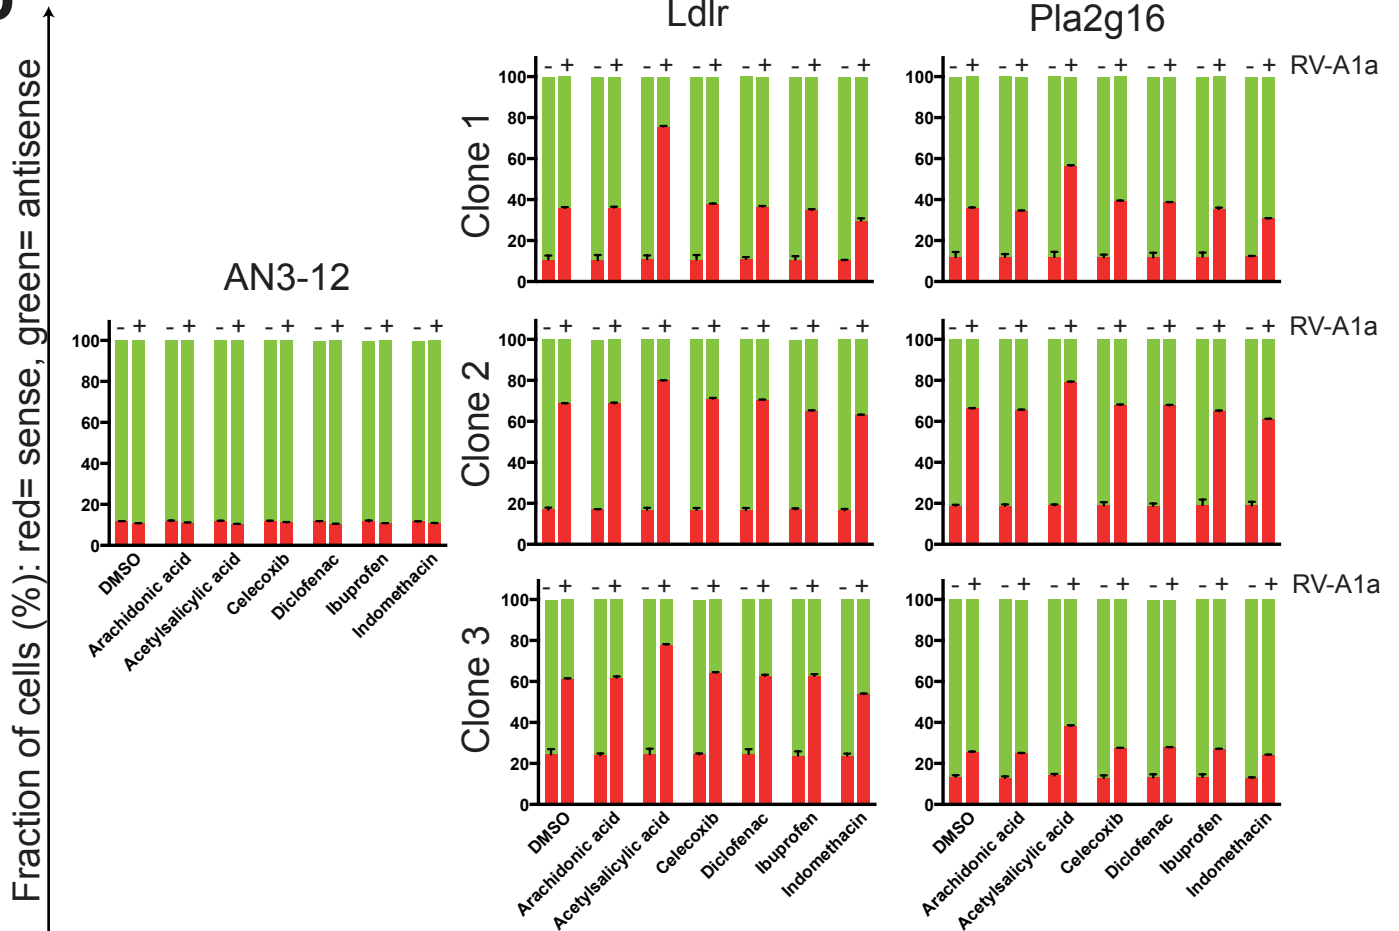

# Extended Data Figure 9

**a** HEK293T cells + RV-A1a

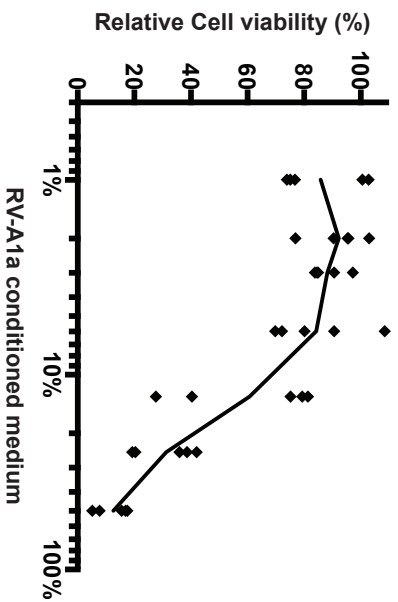

**b** HEK293T cells + RV-A1a

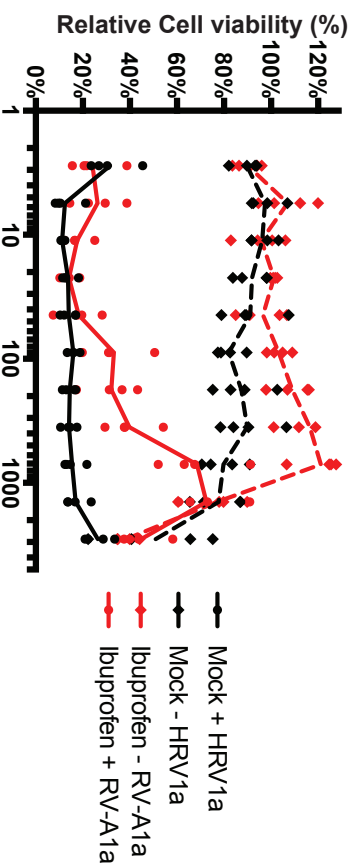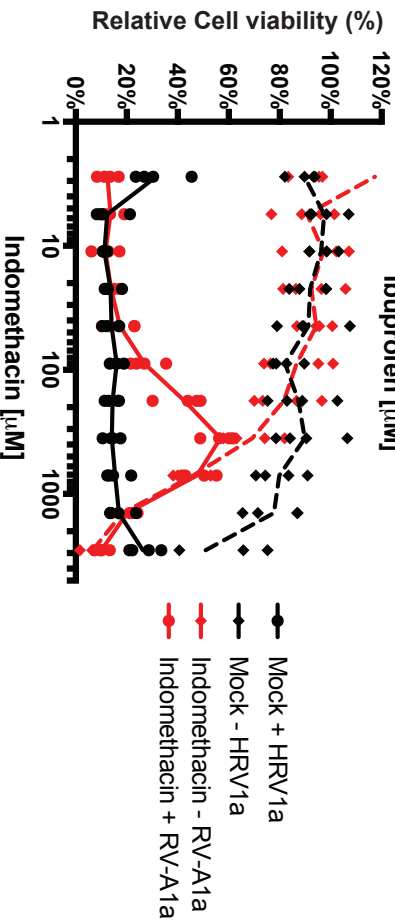

**c**

HEK293T cells no virus

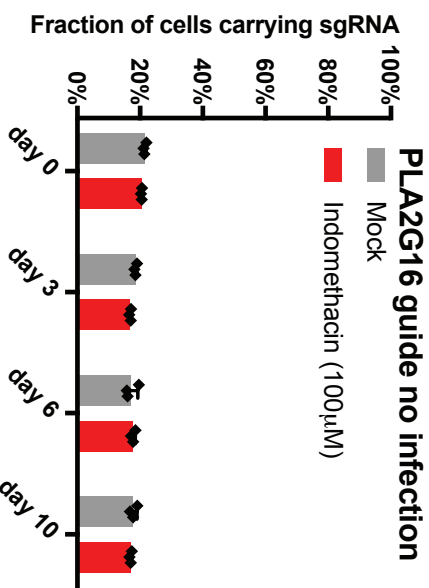

HEK293T cells + RV-A1a

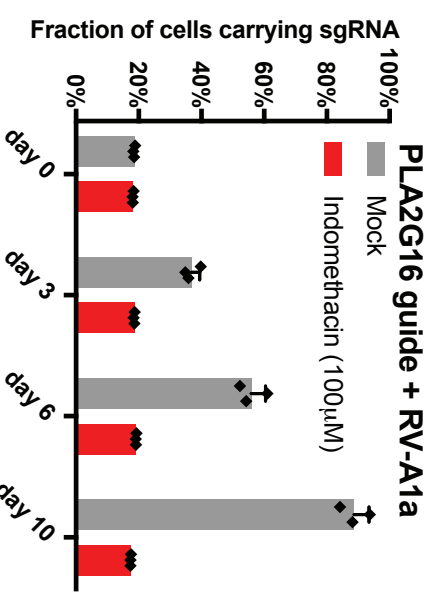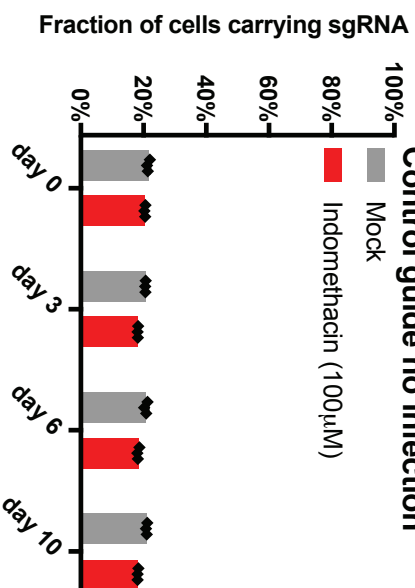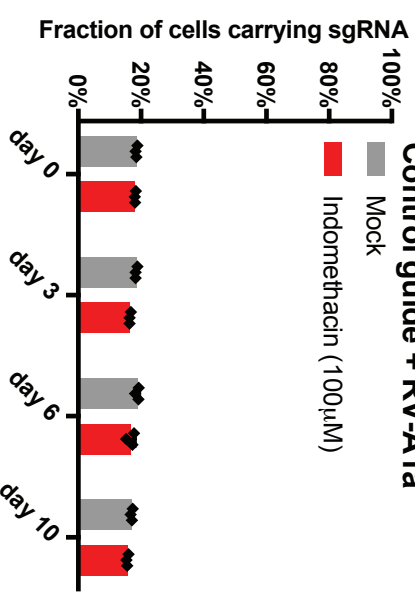

**Extended Data Figure 10**

**a**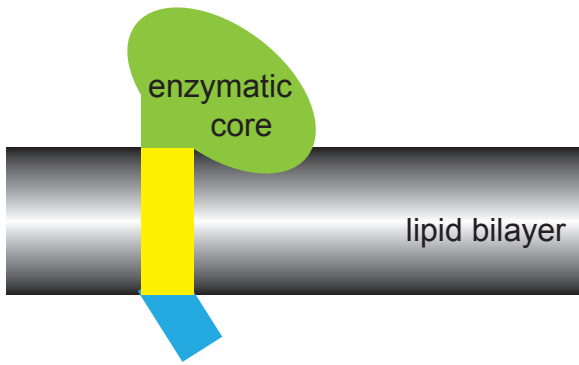**b**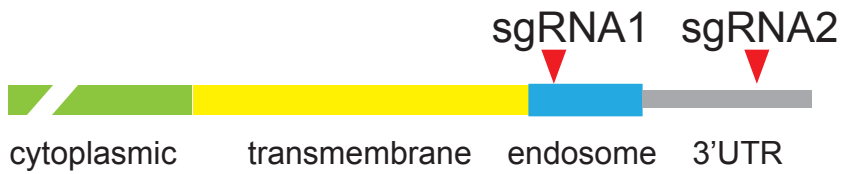**c**

| wt     | cytoplasmic                                                              | transmembrane | vesicular |          |
|--------|--------------------------------------------------------------------------|---------------|-----------|----------|
|        | V R D A V K A V G I A G V G L A A L G L V G V M L S R N N K K Q K Q Stop |               |           |          |
| sgRNA1 | V R D A V K A V G I A G V G L A A L G L V G V M L S R N N K K Q K Q Stop |               |           | Control  |
| sgRNA1 | V R D A V K A V G I A G V G L A A L G L V G V M L S R N N K K Q K Q Stop |               |           | + RV-A1a |
| sgRNA2 | V R D A V K A V G I A G V G L A A L G L V G V M L S R N N K K Q K Q Stop |               |           | Control  |
| sgRNA2 | V R D A V K A V G I A G V G L A A L G L V G V M L S R N N K K Q K Q Stop |               |           | + RV-A1a |

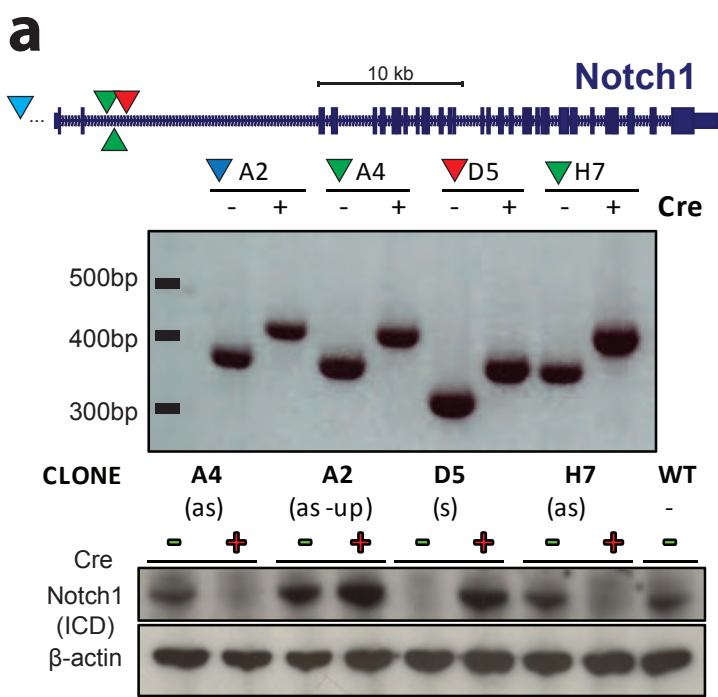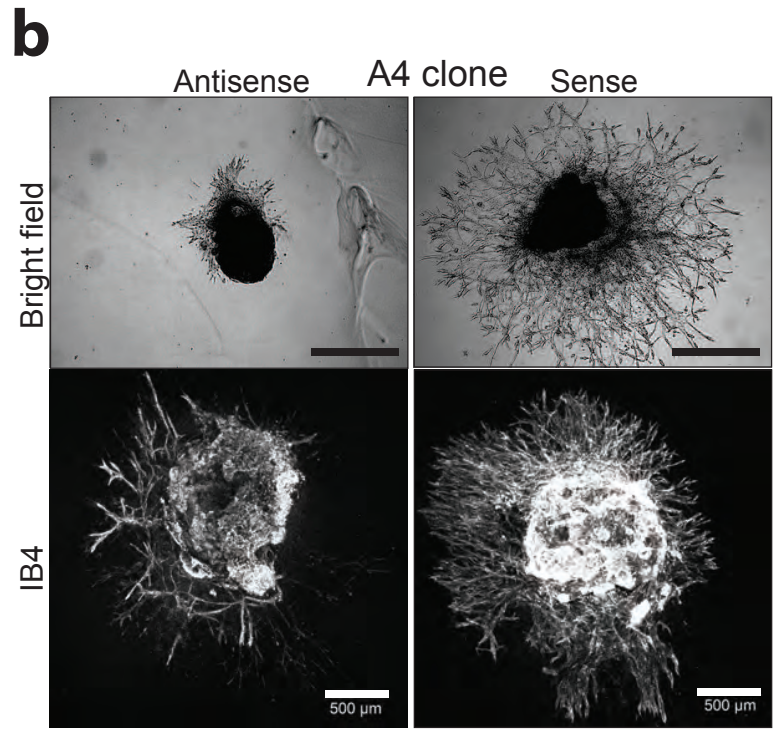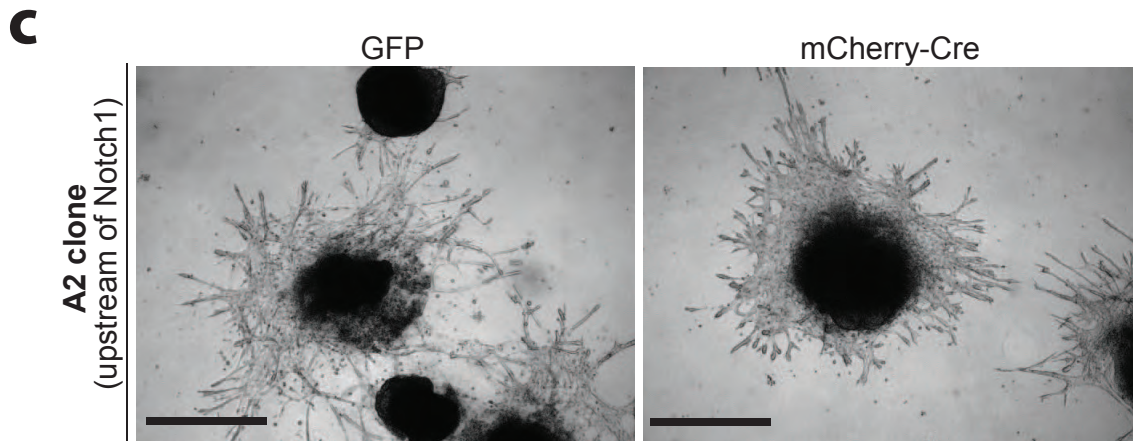

# Extended Data Figure 12

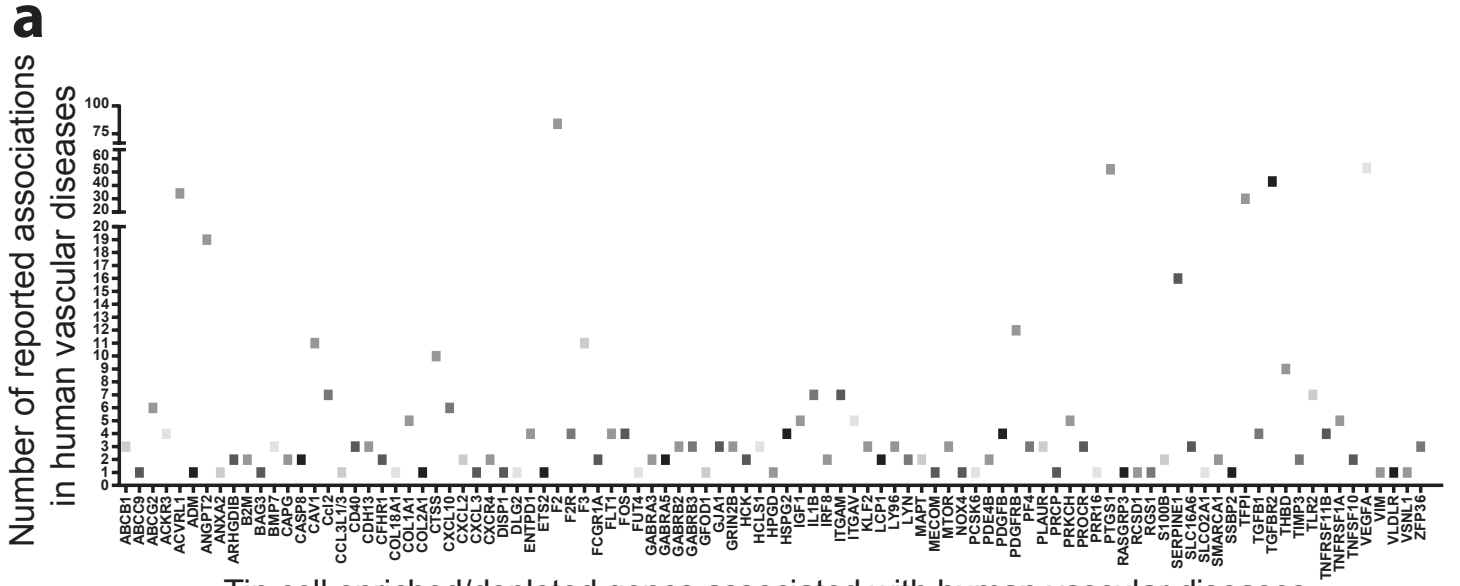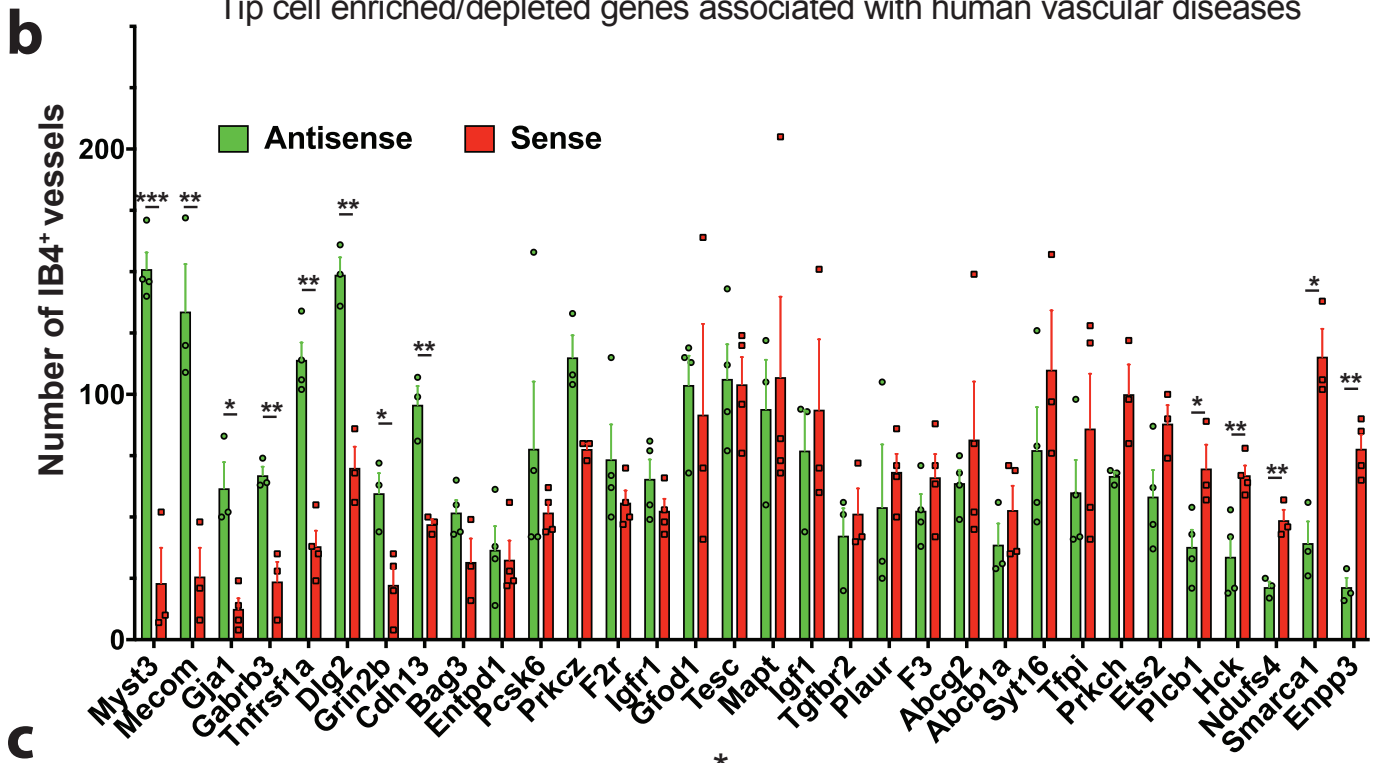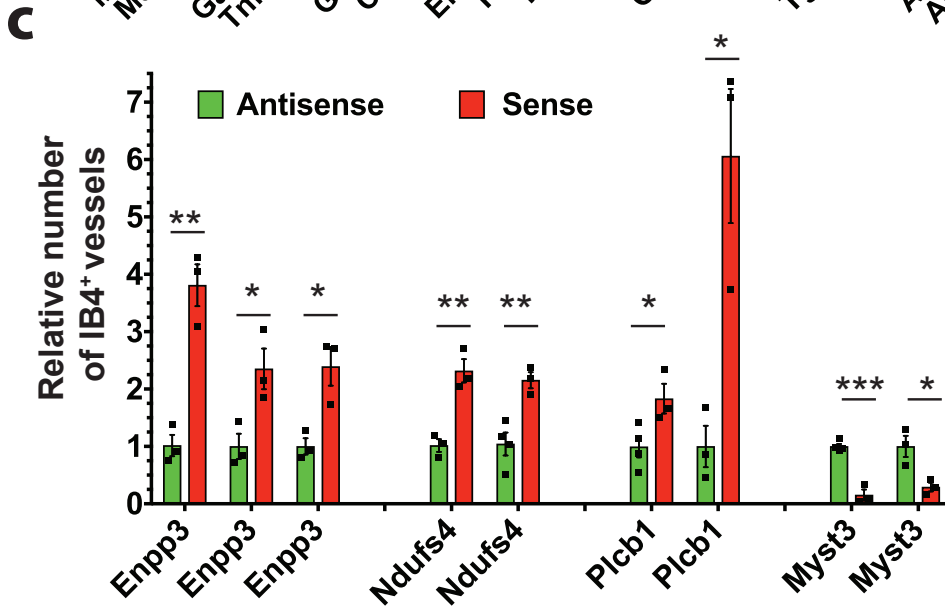

**Extended Data Figure 13**



IB4 GFP mCherry-Cre DAPI

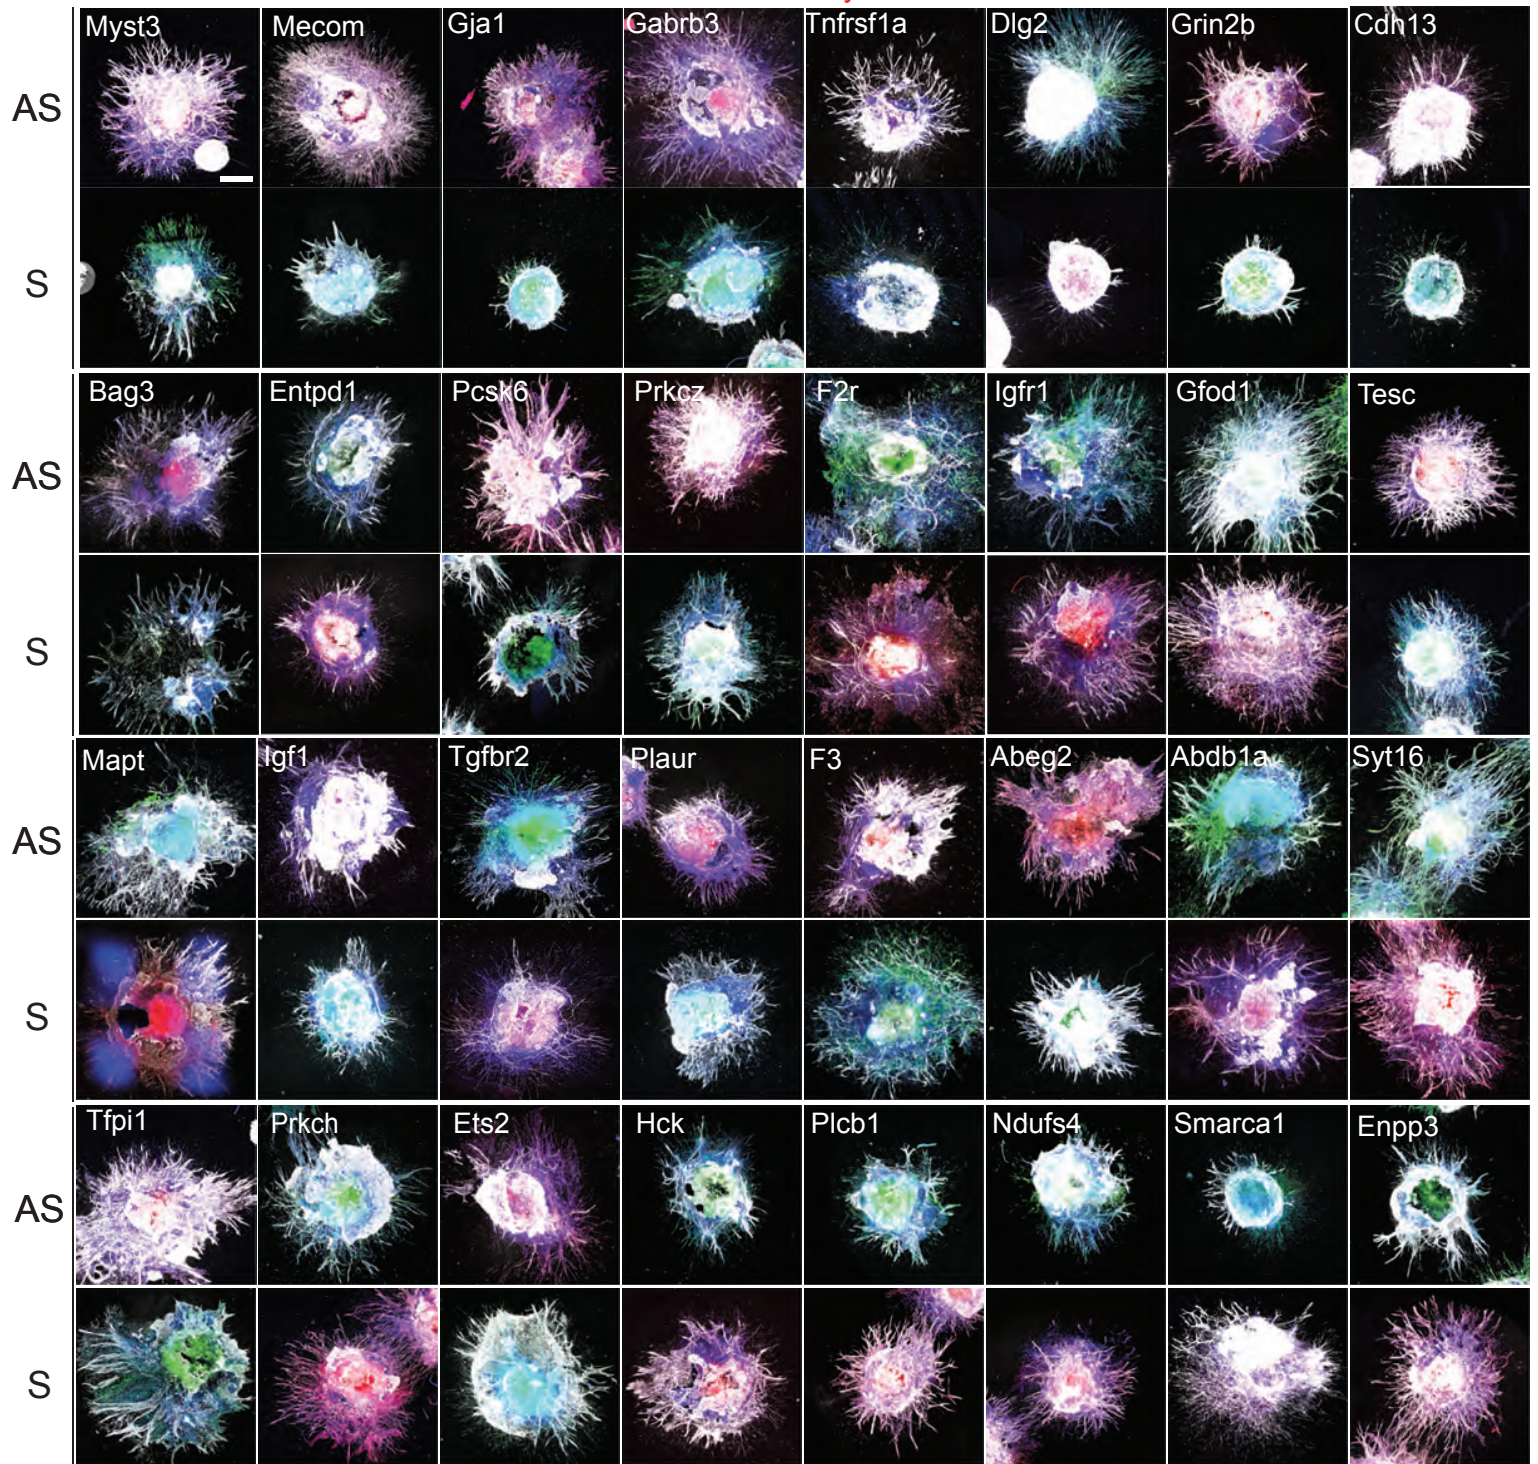

**Extended Data Figure 14**



**a**

DAPI

mCherry<sup>+</sup>ES cell derived  
tissueIB4<sup>+</sup> mCherry<sup>+</sup>

Mosaic blood vessel

IB4<sup>+</sup>Endogenous  
endothelial cell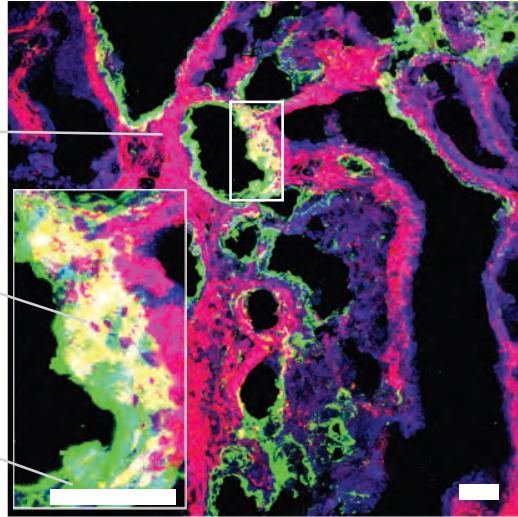**b**Myst3  
chimaeric EBs

Sense (GFP):Antisense (mCherry-Cre) 1:1

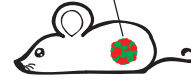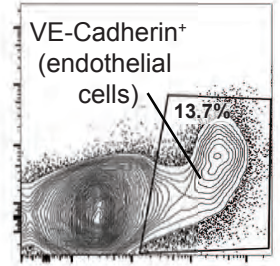

VE-Cadherin

mCherry (antisense)

Non-endothelial cells

7.82%

8.77%

8.77%

8.77%

8.77%

8.77%

8.77%

8.77%

8.77%

8.77%

8.77%

8.77%

8.77%

8.77%

8.77%

8.77%

8.77%

8.77%

8.77%

8.77%

8.77%

8.77%

8.77%

8.77%

8.77%

8.77%

8.77%

8.77%

8.77%

8.77%

8.77%

8.77%

8.77%

8.77%

8.77%

8.77%

8.77%

8.77%

8.77%

8.77%

8.77%

8.77%

8.77%

8.77%

8.77%

8.77%

8.77%

8.77%

8.77%

8.77%

8.77%

8.77%

8.77%

Endothelial cells

7.25%

2.17%

2.17%

2.17%

2.17%

2.17%

2.17%

2.17%

2.17%

2.17%

2.17%

2.17%

2.17%

2.17%

2.17%

2.17%

2.17%

2.17%

2.17%

2.17%

2.17%

2.17%

2.17%

2.17%

2.17%

2.17%

2.17%

2.17%

2.17%

2.17%

2.17%

2.17%

2.17%

2.17%

2.17%

2.17%

2.17%

2.17%

2.17%

2.17%

2.17%

2.17%

2.17%

2.17%

2.17%

2.17%

2.17%

2.17%

2.17%

2.17%

2.17%

2.17%

2.17%

GFP (sense)

**c**

GFP

mCherry-Cre

IB4 GFP mCherry DAPI

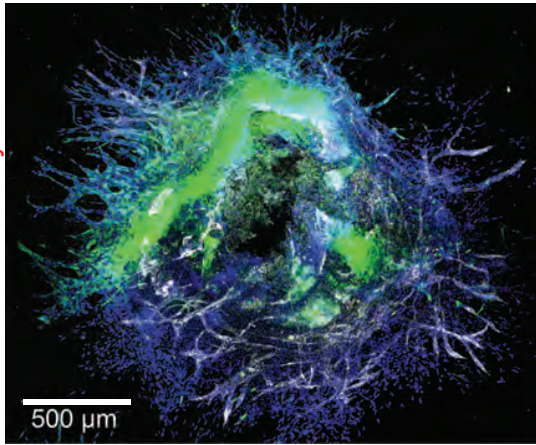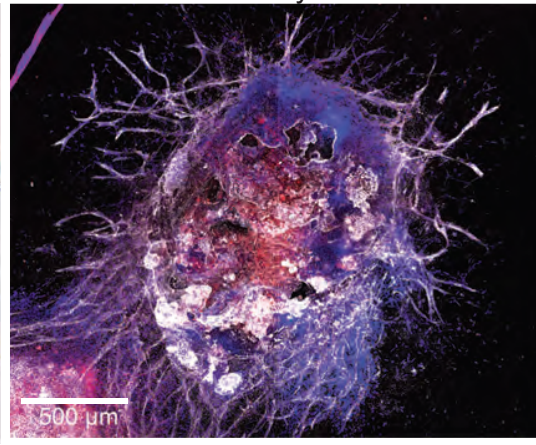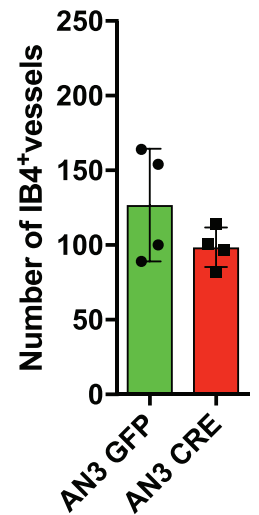**d**

eV-GFP:mCherry-Cre 1:1

GFP mCherry DAPI

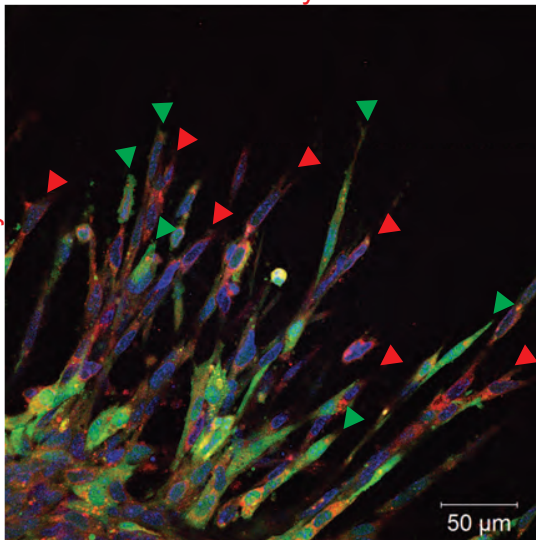%Contribution to  
the tip position100  
75  
50  
25  
0

mCherry-Cre

GFP

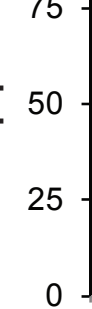

# Extended Data Figure 15



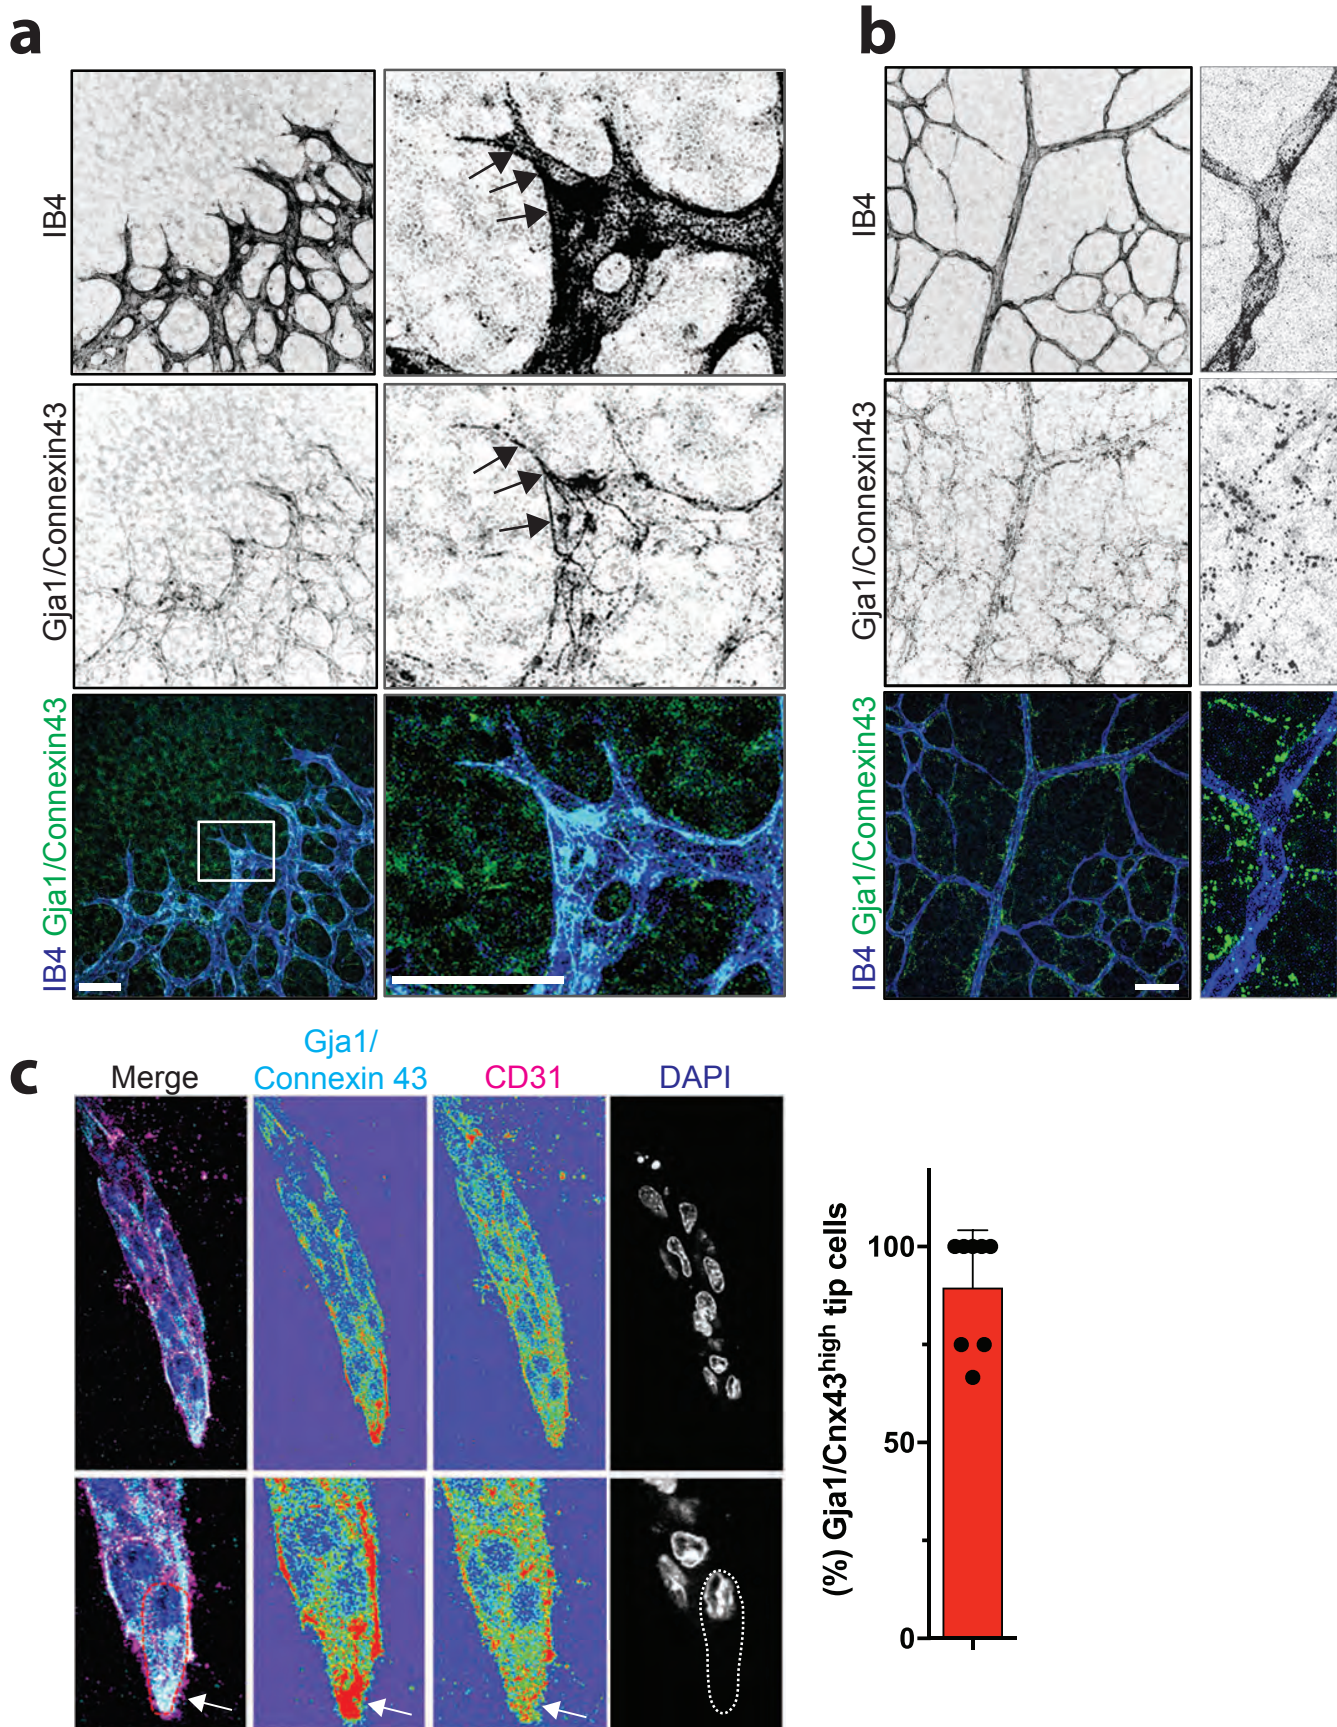

**Extended Data Figure 16**
